# Supplementary material for: Synthesis of Z-schemes 0D–3D heterojunction bi-functional photocatalyst with ZnInCuS alloyed QDs supported BiOI MF for H2O2 production and N2 fixation
Source: Royal Society of Chemistry journal article supplement (doi:10.1039/d2cy02107b), 2023-01-01
Supplement: d2cy02107b1.pdf [file d2cy02107b1.pdf]

**Electronic Supporting Information (ESI)**

**Synthesis of Z-scheme 0D-3D Heterojunction Bi-functional Photocatalyst with ZnInCuS**

**Alloyed QDs Supported BiOI MF for H<sub>2</sub>O<sub>2</sub> Production and N<sub>2</sub> Fixation**

Deeptimayee Prusty, Sriram Mansingh and K.M. Parida\*

Centre for Nanoscience and Nanotechnology, Siksha 'O' Anusandhan (Deemed to be  
University), Bhubaneswar-751030, Odisha (India)

\*Corresponding author

E-mail: paridakulamani@yahoo.com &

kulamaniparida@soa.ac.in

---

## Experimental section

### Chemicals Requirement

Copper chloride dihydrate ( $\text{CuCl}_2 \cdot 2\text{H}_2\text{O}$ , 99%), Potassium iodide (KI, >99.5%), Thioglycolic acid (TGA, 79%), sodium hydroxide (NaOH, 97%),  $\text{Zn}(\text{OAc})_2 \cdot 2\text{H}_2\text{O}$  (>99%), Ethylene glycol (EG, >99%), TA (Terephthalic Acid), NBT (nitro blue tetrazolium chloride), Nafion, EDTA,  $\text{H}_2\text{O}_2$  Methanol,  $\text{Na}_2\text{SO}_4$ , Thiourea were purchased from Merck and Indium chloride ( $\text{InCl}_3$ , 98%), sodium sulfide nonahydrate ( $\text{Na}_2\text{S} \cdot 9\text{H}_2\text{O}$ , 58%), Ammonium molybdate, DMSO from Himedia Pvt. Ltd. All reagents in the experiment are analytical grade and used without further purification.

### Synthesis of BiOI Micro-flower (BOI MF):

BOI MFs were developed *via* simple hydrolysis strategy in the presence of EG (as a structure directing reagent) at ordinary temperature. For this reason, 10.0 mL EG along with 0.0028 mol of  $\text{Bi}(\text{NO}_3)_3 \cdot 5\text{H}_2\text{O}$  were mixed drop-wise into aqueous KI solution (10.0 mL) with 5 h of continuous stirring. A brick-red color appeared which was subsequently filtered and washed with ethanol water solution. Then the filtrate was dried at  $60^\circ\text{C}$  for 8 h to acquire BOI MFs.<sup>1</sup>

### Synthesis of Zn-Cu-In-S Quantum dot (ZCIS QD):

The ZCIS quaternary alloyed QDs were fabricated in a one pot reflux approach. In the executed experiment, 2.0, 0.5, 20.0 mmol of  $\text{InCl}_3 \cdot 4\text{H}_2\text{O}$ ,  $\text{CuCl}_2 \cdot 2\text{H}_2\text{O}$ , and TGA respectively, were diluted in requisite amount of de-ionized (DI) water in a two-necked flask. The pH of the above solution was accustomed to 10.5 by adding 1M NaOH solution. Aqueous solution of 1.3 mmol of  $\text{Na}_2\text{S} \cdot 9\text{H}_2\text{O}$ , as a sulfur source was introduced into the round-bottom-flask, and the entire solution was refluxed for 4 h at  $100^\circ\text{C}$ . Then, a solution of 2.0 mmol  $\text{Zn}(\text{OAc})_2 \cdot 2\text{H}_2\text{O}$ , 3.0 mmol TGA, and 2.0 mmol thiourea were inserted into the flask, and subjected to reflux at the same

temperature for an hour to obtain ZCIS colloidal solution. Then the entire solution was treated with ethanol for precipitation, and dehydrated at room temperature under vacuum to get ZCIS alloyed QDs.<sup>2</sup>

### **Characterization**

Structural and morphological analysis of synthesized samples was characterized by X-Ray Diffraction technique (XRD), High-Resolution-Transmission-Electron-Microscopy (HRTEM), Field Emission Scanning Electron Microscopy (FESEM), X-ray photoelectron-spectroscopy (XPS), and Raman analysis. The crystallinity and phase purity of the catalysts were examined by using Powder-XRD in a RigakuUltima-IV diffractometer (40 KV/40 mA), outfitted with a radiation of  $K\alpha$  Cu ( $\lambda = 1.54 \text{ \AA}$ ), and at  $2\theta = 10\text{-}60^\circ$ . XPS analysis was performed with a spectrometer (VG MicrotechMultilab ESCA 3000) by using a  $K\alpha$  Mg X-ray source to evaluate the surface elemental states, and chemical compositions of the materials. C 1s (binding energy = 284.8 eV) is considered as a reference for the calibration of spectrum. The morphological characterization of the synthesized materials was evaluated by FESEM tool (FEI Quanta 400FEG-SEM). Additionally, the particle size and core structure of the materials were estimated by JEOL-2100 HRTEM analyzer (200 kV). Raman spectrometer is used to know oxygen vacancy and composite formation of the materials and here a laser of 332 nm RENISHAW via Raman spectrometer was used for the analysis. To estimate the optical properties of the prepared samples, Photoluminescence (PL) and UV- VIS diffuse-reflectance-spectroscopy (UV-Vis DRS) were used. The absorbance spectra were obtained by JASCO-V-750 UV-Visible spectrophotometer ( $\lambda = 200\text{-}800 \text{ nm}$ ,  $\text{BaSO}_4$  as reference) to elucidate the absorbance and bandgap energy of the materials. The excitation and PL emission spectra were evaluated with the help of JASCO-FP-8300 spectrometer, using Xenon lamp as excitation source. The

electrochemical characteristics were performed by using multichannel Iviumpotentiostat analyzer in a three electrode system, where Ag/AgCl used as reference, Pt as counter, and the synthesized sample as working electrode. Here, 0.1M Na<sub>2</sub>SO<sub>4</sub> (pH = 6.8) solution acted as electrolyte for the electrochemical analysis. 300W Xe-lamp was used as light radiance by using 400 nm cut-off filter.

### **Photocatalytic H<sub>2</sub>O<sub>2</sub> Evolution:**

The oxygen reduction to H<sub>2</sub>O<sub>2</sub> was carried out following our previous reported paper.<sup>2</sup> The H<sub>2</sub>O<sub>2</sub> evolution capacity of prepared quantum dots was tested in the photoreactor (Fig.S3) having a 250 W Hg light source (cut-filter > 420nm) and refrigerated water circulation to control the reaction temperature. In the preformed reduction reaction, 10 mg of QD sample was added to 10 vol% 20 mL of deionised water/alcohol mixed solution and dispersed for 15 min by ultrasonication. The above catalyst mixed suspension was then saturated with oxygen gas (99% purity) for 1 h under dark with stirring to achieve both O<sub>2</sub> saturation and adsorption-desorption equilibrium. Afterwards, the above suspension was agitated with the Hg lamp for 2 h. Then the light treated solution was centrifuged followed by filtration to separate the catalyst from the solution, similar type of reduction procedure was also adopted for all the samples. Further, the concentration of H<sub>2</sub>O<sub>2</sub> in catalyst free solution (filtrate) was then determined using iodine-colorimetric method at 350 nm by our JASCO-750 spectrophotometer. Additionally, blank experiment was also carried out in the absence of photocatalyst and light to justify that the performed H<sub>2</sub>O<sub>2</sub> production is through photocatalysis pathway using supplied O<sub>2</sub> and light.

### **Photocatalytic NH<sub>3</sub> Evolution:**

The photocatalytic reduction of N<sub>2</sub> to NH<sub>3</sub> was also experimented with the best catalyst (ZCIS-BOI(1:1)) using the same quartz reactor as mentioned above under similar experimental

condition only change in place of O<sub>2</sub> gas, N<sub>2</sub> gas was purged to form N<sub>2</sub> saturated mixed solution. Priors to photocatalytic reduction reaction, the above suspension, i.e., catalyst mixed N<sub>2</sub> saturated solution was stirred in dark for 30 min to attained adsorption-desorption equilibrium. At last, the concentration of NH<sub>3</sub> generated by the reduction of supplied N<sub>2</sub> was determined spectrometrically by indophenol method using UV-vis spectrometer following our previous paper.<sup>3</sup> Blank experiments were also carried out in the absence of a catalyst(light presence) and light(catalyst absence) to full proof that the N<sub>2</sub> reduction reaction (NRR) proceeds via photocatalysis route using the supplied N<sub>2</sub> and light source.

#### **Fabrication of working electrodes:**

The electrodes were made by drop casting method taking 0.25 mg of the prepared catalysts. At first the photocatalysts were dispersed in 0.4 ml ethanol along with 20 $\mu$ L nafion solution. Then the ensuing suspensions were sonicated for 10 minutes to get homogeneous mixture. Further, the solutions were drop-casted on surface of the conducting sides of 1 cm<sup>2</sup> area of FTO (Fluorine-Doped-Tin-Oxide). The photocatalysts loaded FTO were then dehydrated by keeping in a vacuum-oven overnight at ordinary temperature for electrochemical study.

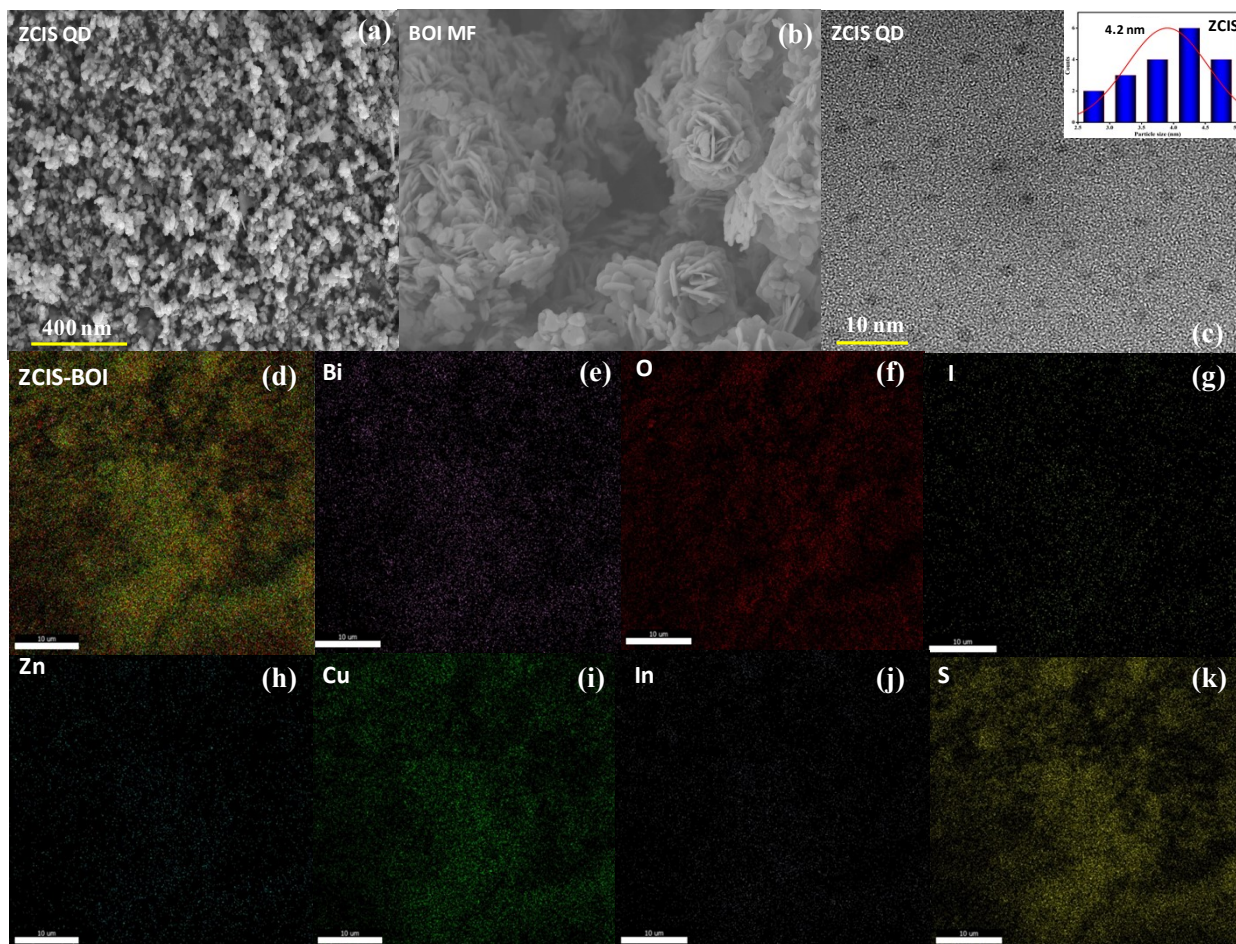

Fig. S1: FESEM image of (a) ZCIS, (b) BOI; (c) HRTEM image of ZCIS; and, color-mapping images of (d) ZCIS-BOI (1:1) composite, (e) Zn, (f) Cu, (g) In, (h) S, (i) Bi, (j) O, and (k) I.

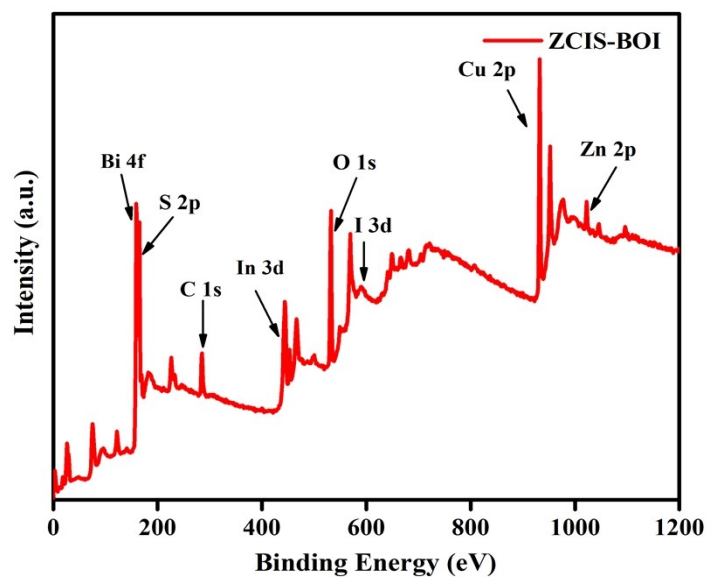

Fig. S2: XPS Survey of ZCIS-BOI(1:1).

Table-S1: Comparison table of binding energy in pristine BOI and ZCIS with ZCIS-BOI(1:1) composite.

| Elements | Binding energy in BOI | Binding energy In ZCIS-BOI | Elements | Binding energy in ZCIS | Binding energy In ZCIS-BOI |
|----------|-----------------------|----------------------------|----------|------------------------|----------------------------|
| Bi       | 158.8 eV              | 159.4 eV                   | Zn       | 1022.8 eV              | 1022.5 eV                  |
|          | 164.2 eV              | 164.6 eV                   |          | 1045.8 eV              | 1045.5 eV                  |
| O        | 529.6 eV              | 529.8 eV                   | Cu       | 932.4 eV               | 932.1 eV                   |
|          | 531.0 eV              | 531.3 eV                   |          | 952.2 eV               | 952.1 eV                   |
|          | 532.5 eV              | 532.7 eV                   |          |                        |                            |
| I        | 618.5 eV              | 618.8 eV                   | In       | 445.3 eV               | 445.1 eV                   |
|          | 630.1 eV              | 630.3 eV                   |          | 452.9 eV               | 452.8 eV                   |
|          |                       |                            | S        | 158.9 eV               | 158.7 eV                   |
|          |                       |                            |          | 163.9 eV               | 164.0 eV                   |



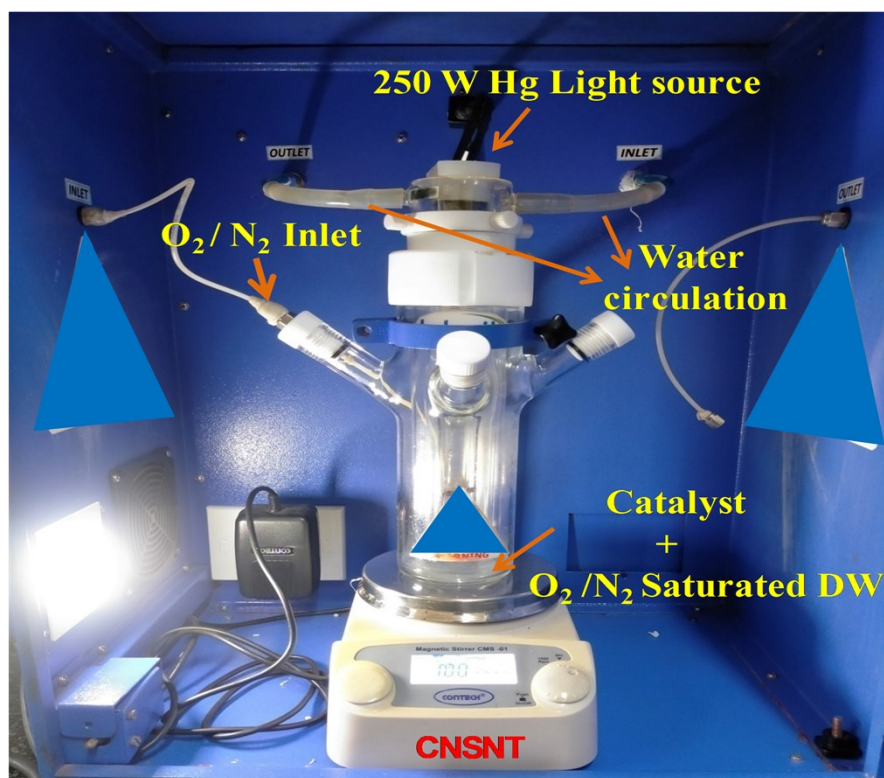

Fig. S3: H<sub>2</sub>O<sub>2</sub>/N<sub>2</sub> production reactor setup.

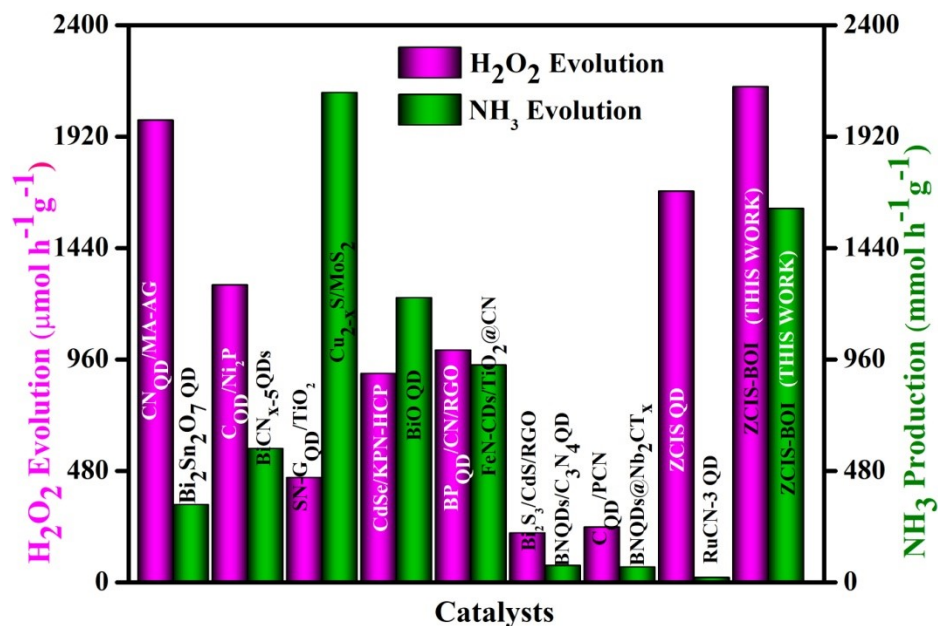

Fig. S4: Comparison study of H<sub>2</sub>O<sub>2</sub> and NH<sub>3</sub> production over various reported photocatalyst

catalysts.<sup>2,4-17</sup>



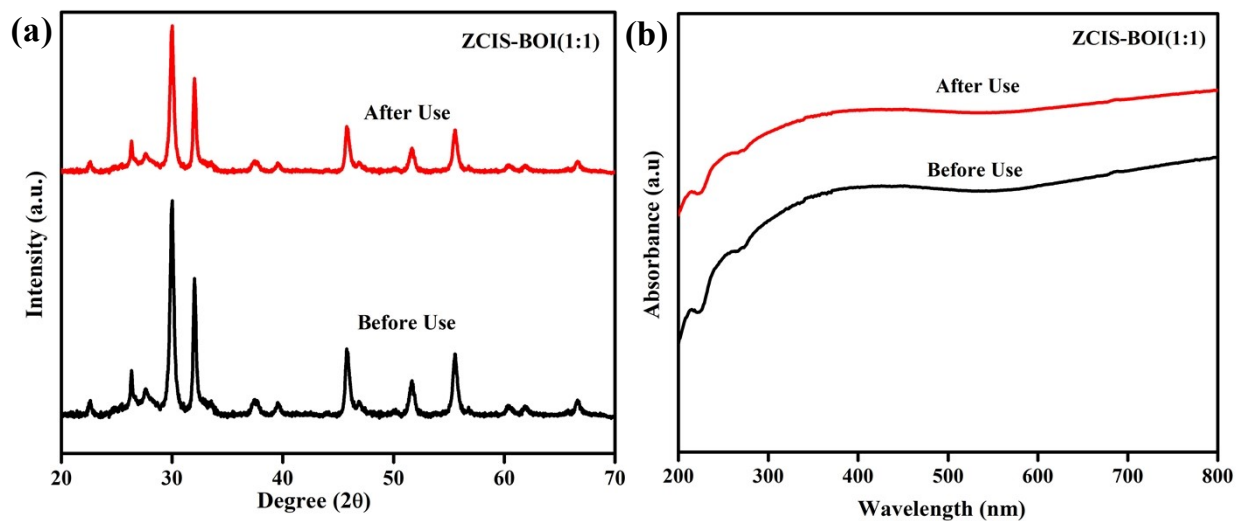

Fig. S5: XRD and UV of ZCIS-BOI(1:1) after and before use.

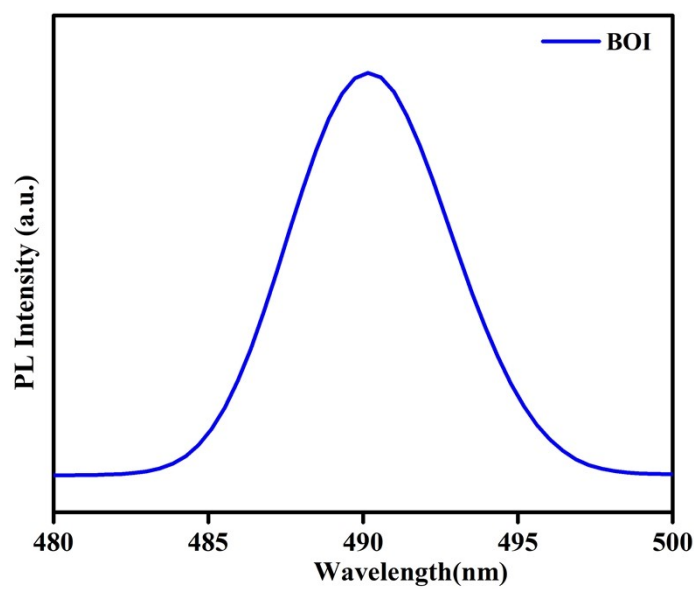

Fig. S6: PL plot of BOI.

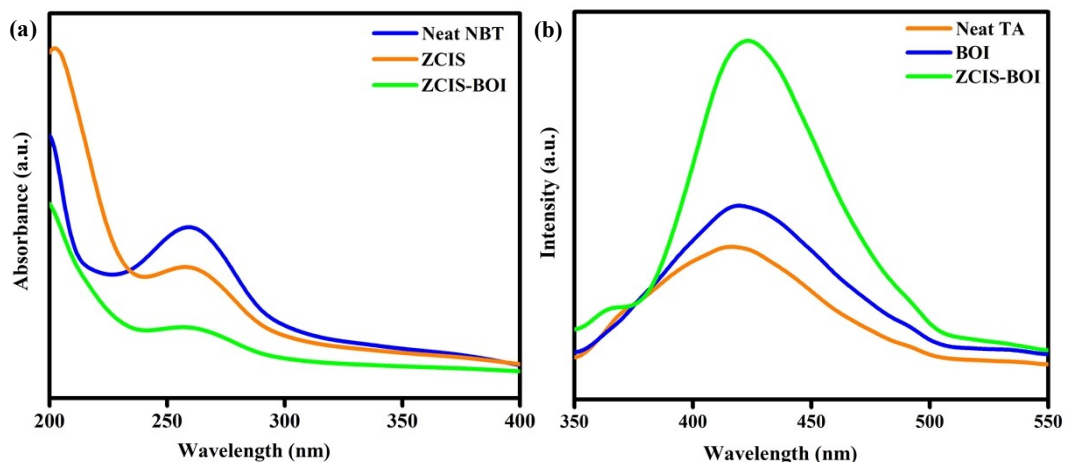

Fig. S7: (a) NBT analysis, (b) TA analysis.

### H<sub>2</sub>O<sub>2</sub> Evolution

#### Calculation of solar to chemical conversion efficiency (SCC %) for H<sub>2</sub>O<sub>2</sub> production<sup>2</sup>

SCC % of ZCIS-BOI(1:1) towards H<sub>2</sub>O<sub>2</sub> evolution under 250 W Hg-lamp can be calculated by following the equation below:

$$\text{SCC \%} = \frac{\Delta G^\circ \text{ for H}_2\text{O}_2 \text{ generation (J/mol)} \times \text{H}_2\text{O}_2 \text{ produced (mol)}}{\text{Input energy (W)} \times \text{reaction time(s)}} \times 100 \text{ ----- (1)}$$

Further,  $\Delta G^\circ$  for H<sub>2</sub>O<sub>2</sub> evolution is 117 KJ.mol<sup>-1</sup>. The irradiance of 250 W Hg-lamp is 1.33 W.cm<sup>-2</sup> and 84.78 cm<sup>2</sup> irradiated area. In a 1 h of reaction time, the amount of H<sub>2</sub>O<sub>2</sub> produced is 85.4 μmol.

$$\text{Input Energy (W)} = \text{irradiance (Wcm}^{-2}\text{)} \times \text{irradiated area (cm}^2\text{)}$$

$$= 1.33 \times 84.78$$

$$= 112.75 \text{ W}$$

Acc. to equation (1), the SCC efficiency is calculated to be 0.24%.

#### Calculation of solar to chemical conversion efficiency (SCC %) for NH<sub>3</sub> generation<sup>3</sup>

Solar to chemical conversion efficiency (SCC %) of ZCIS-BOI(1:1) heterojunction towards NH<sub>3</sub> evolution under 250 W Hg lamp was calculated by the following Eq<sup>n</sup>:

$$\text{SCC \%} = \frac{\Delta G^\circ \text{ for NH}_3 \text{ production (J/mol)} \times \text{NH}_3 \text{ produced (mol)}}{\text{Input energy (W)} \times \text{reaction time(s)}} \times 100$$
$$= \frac{339000 \times 0.032}{1330 \times 3600} \times 100 = 0.36\%$$

## Reference

1. D. Prusty, S. Mansingh, L. Acharya, L. Paramanik and K. M. Parida, Robust Direct Z-Scheme Exciton Transfer Dynamics by Architecting 3D BiOI MF-Supported Non-Stoichiometric Cu<sub>0.75</sub>In<sub>0.25</sub>S NC Nanocomposite for Co-Catalyst-Free Photocatalytic Hydrogen Evolution. *RSC Adv.* 2022, **12**, 1265–1277.
2. D. Prusty, S. Mansingh, N. Priyadarshini and K.M. Parida, Defect Control via Compositional Engineering of Zn-Cu-In-S Alloyed QDs for Photocatalytic H<sub>2</sub>O<sub>2</sub> Generation and Micropollutant Degradation: Affecting Parameters, Kinetics, and Insightful Mechanism. *Inorganic Chemistry*, 2022.  
<https://doi.org/10.1021/acs.inorgchem.2c02977>
3. S. Mansingh, S. Subudhi, S. Sultana, G. Swain and K. Parida, Cerium-Based Metal–Organic Framework Nanorods Nucleated on CeO<sub>2</sub> Nanosheets for Photocatalytic N<sub>2</sub> Fixation and Water Oxidation. *ACS Appl. Nano Mater.*, 2021, **4**, 9635-9652.
4. M. Yin, X. Chen, Y. Wan, W. Zhang, L. Feng, L. Zhang and H. Wang, Doping Carbon Nitride Quantum Dots into Melamine-silver Matrix: An Efficient Photocatalyst with Tunable Morphology and Photocatalysis for H<sub>2</sub>O<sub>2</sub> Evolution under Visible Light. *ChemCatChem*, 2020, **12**, 1512–1518.
5. L. Zheng, H. Su, J. Zhang, L. S. Walekar, H. V. Molamahmood, B. Zhou, M. Long and

- Y. H. Hu, Highly Selective Photocatalytic Production of H<sub>2</sub>O<sub>2</sub> on Sulfur and Nitrogen Co-Doped Graphene Quantum Dots Tuned TiO<sub>2</sub>. *Appl. Catal. B Environ.*, 2018, **239**, 475–484.
6. J. Xu, Q. Ji, Y. Wang, C. Wang and L. Wang, Enhanced Photocatalytic H<sub>2</sub>/H<sub>2</sub>O<sub>2</sub> Production and Tetracycline Degradation Performance of CdSe Quantum Dots Supported on K, P, N-Co-Doped Hollow Carbon Polyhedrons. *Chem. Eng. J.* 2021, **426**, 130808.
7. J. Xiong, X. Li, J. Huang, X. Gao, Z. Chen, J. Liu, H. Li, B. Kang, W. Yao and Y. Zhu, CN/RGO@BP QDs High-Low Junctions with Stretching Spatial Charge Separation Ability for Photocatalytic Degradation and H<sub>2</sub>O<sub>2</sub> Production. *Appl. Catal. B Environ.*, 2020, **266**, 118602.
8. S. M. Ghoreishian, K. S. Ranjith, B. Park, S.-K. Hwang, R. Hosseini, R. Behjatmanesh-Ardakani, S. M. Pourmortazavi, H. U. Lee, B. Son and S. Mirsadeghi, Full-Spectrum-Responsive Bi<sub>2</sub>S<sub>3</sub>@CdS S-Scheme Heterostructure with Intimated Ultrathin RGO toward Photocatalytic Cr (VI) Reduction and H<sub>2</sub>O<sub>2</sub> Production: Experimental and DFT Studies. *Chem. Eng. J.*, 2021, **419**, 129530.
9. J. Shi, Y. Luo, T. Yang, H. Wang, C. Ju, K. Pu, J. Shi, T. Zhao, J. Xue and Y. Li, Enhanced Nonsacrificial Photocatalytic Generation of Hydrogen Peroxide under Visible Light Using Modified Graphitic Carbon Nitride with Doped Phosphorus and Loaded Carbon Quantum Dots: Constructing Electron Transfer Channel. *J. Colloid Interface Sci.*, 2022, **628**, 259-272.

10. Y. Zhang, J. Di, X. Qian, M. Ji, Z. Tian, L. Ye, J. Zhao, S. Yin, H. Li and J. Xia, Oxygen vacancies in  $\text{Bi}_2\text{Sn}_2\text{O}_7$  quantum dots to trigger efficient photocatalytic nitrogen reduction. *Applied Catalysis B: Environ.*, 2021, **299**, 120680.
11. C. Liang, H.Y. Niu, H. Guo, C.G. Niu, Y.Y. Yang, H.Y. Liu, W.W. Tang, H.P. Feng, Efficient photocatalytic nitrogen fixation to ammonia over bismuth monoxide quantum dots-modified defective ultrathin graphitic carbon nitride. *Chem. Eng. J.*, 2021, **406**, 126868.
12. T. Jiang, L. Li, L. Li, Y. Liu, D. Zhang, D. Zhang, H. Li, B. Mao and W. Shi, Ultra-thin shelled  $\text{Cu}_{2-x}\text{S}/\text{MoS}_2$  quantum dots for enhanced electrocatalytic nitrogen reduction. *Chem. Eng. J.*, 2021, **426**, 130650.
13. S. Sun, Q. An, W. Wang, L. Zhang, J. Liu and W.A. Goddard III, Efficient photocatalytic reduction of dinitrogen to ammonia on bismuth monoxide quantum dots. *J. Mater. Chem. A*, 2017, **5**, 201-209.
14. H. Zhao, J. Duan, Z. Ji, Z. Zhang and W. Wang, High-Performance Gas-Liquid-Solid Optofluidic Microreactor with  $\text{TiO}_{2-x}\text{-Ag}@Hkust-1/\text{Carbon Paper}$  for Efficient Photocatalytic Nitrogen Fixation to Ammonia. *Available at SSRN 4141612*.
15. Q. Li, P. Shen, Y. Tian, X. Li and K. Chu, Metal-Free BN Quantum Dots/Graphitic  $\text{C}_3\text{N}_4$  Heterostructure for Nitrogen Reduction Reaction. *J. Colloid. Interface Sci.*, 2021, **606**, 204-212.
16. K. Chu, X. Li, Q. Li, Y. Guo and H. Zhang, Synergistic enhancement of electrocatalytic nitrogen reduction over boron nitride quantum dots decorated  $\text{Nb}_2\text{CT}_x\text{-MXene}$ . *Small* 2021, **17**, 2102363.

17. S. Wang, D. Guo, M. Zong, C. Fan, X. Jun and D.H. Wang, Unravelling the strong metal-support interaction between Ru quantum dots and g-C<sub>3</sub>N<sub>4</sub> for visible-light photocatalytic nitrogen fixation. *Appl. Catal. A: Gen.*, 2021, **617**, 118112.
